# Supplementary material
Source: Springer Nature journal article supplement (https://www.springermedizin.de/resource/supplementary/12962_2009_106_MOESM3_ESM.pdf/9572210)

- Q1 Adherence to requirements of decisionmaking body
- Q2 Completeness and consistency of reporting evidence
- Q3 Relevance and validity of evidence
- D1 Disease severity
- D2 Size of population affected by disease
- I1 Clinical guidelines
- I2 Comparative interventions limitations
- I3 Improvement of efficacy/effectiveness
- I4 Improvement of safety & tolerability
- I5 Improvement of patient reported outcomes
- I6 Public health interest
- I7 Type of medical service
- E1 Budget impact on health plan
- E2 Cost-effectiveness of intervention
- E3 Impact on other spending

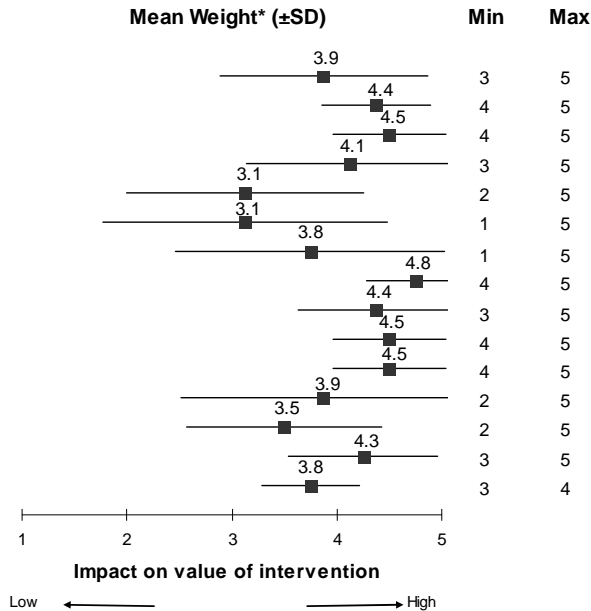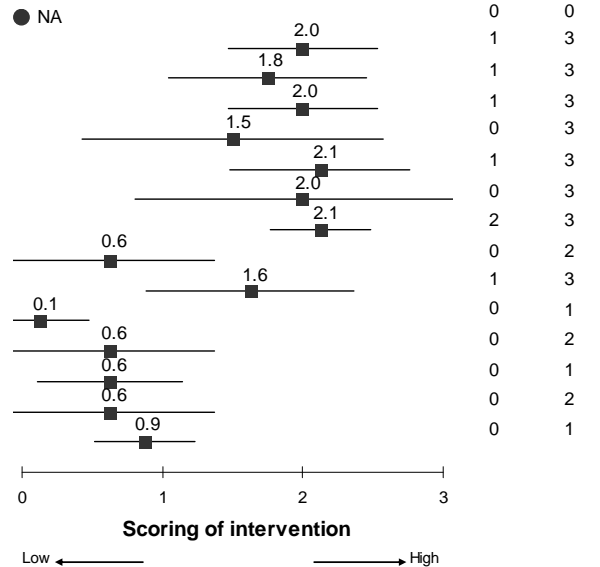

Supplement: MOESM3 [file 9572210]
